# Supplementary material for: Liquid-assisted exfoliation of 2D hBN flakes and their dispersion in PEO to fabricate highly specific and stable linear humidity sensors
Source: Royal Society of Chemistry journal article supplement (doi:10.1039/c7tc04933a), 2018-01-01
Supplement: c7tc04933a1.pdf [file c7tc04933a1.pdf]

## Liquid assisted exfoliation of 2D hBN flakes and their dispersion in PEO to fabricate highly specific and stable linear humidity sensors

Memoon Sajid<sup>1</sup>, Hyun Bum Kim<sup>1</sup>, Jong Hwan Lim<sup>2</sup>, Kyung Hyun Choi<sup>1,\*</sup>

<sup>1,\*</sup> Department of Mechatronics Engineering, D201, Engineering Building 4, Jeju National University, Jeju, South Korea. E-Mail: [amm@jejunu.ac.kr](mailto:amm@jejunu.ac.kr), +82-10-9898-3713

<sup>2</sup> Department of Mechatronics Engineering, Engineering Building 4, Jeju National University, Jeju, South Korea. E-Mail: [jhlim@jejunu.ac.kr](mailto:jhlim@jejunu.ac.kr), +82-10-4516-3713

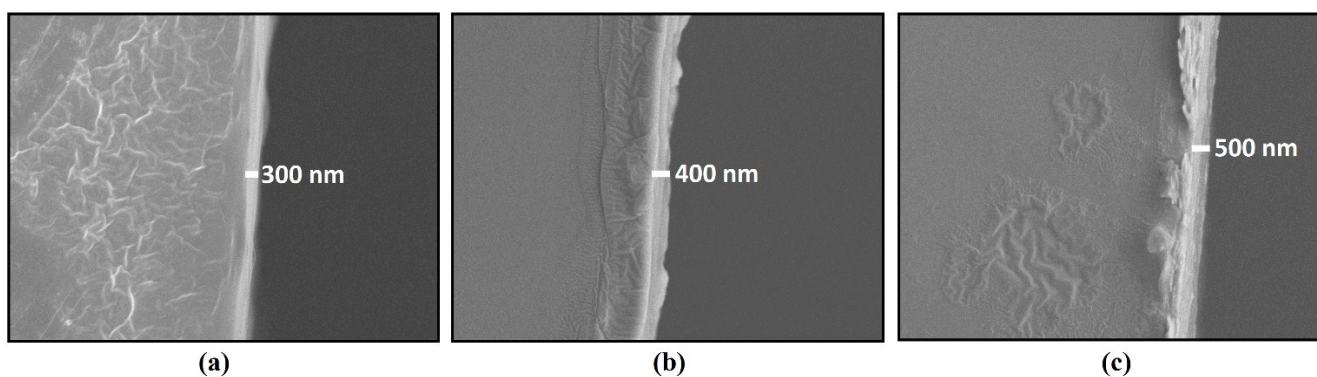

Supplementary Figure 1: Cross Sectional SEM images of the 3 different thickness active layers.

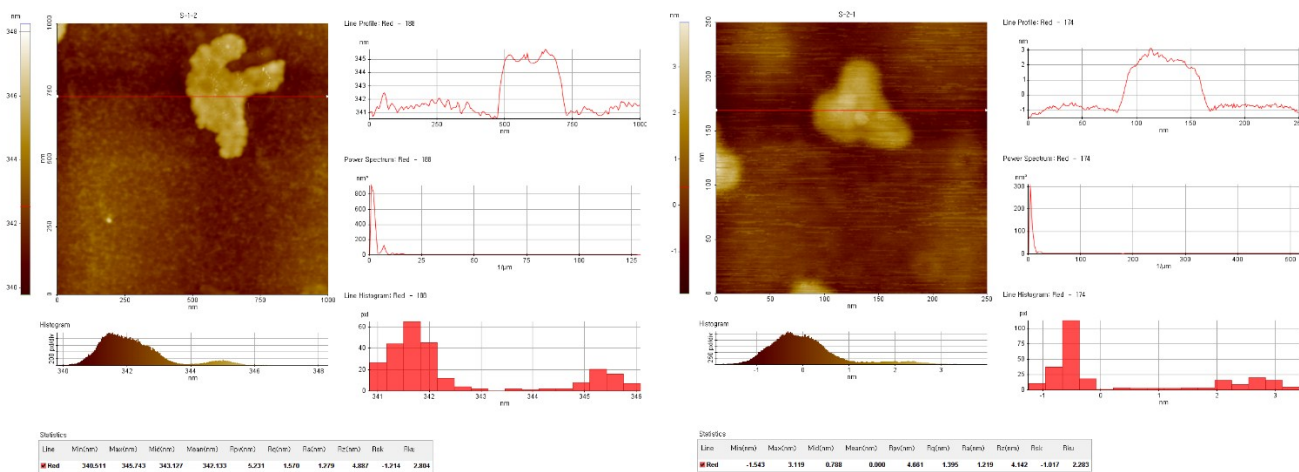

Supplementary Figure 2: AFM images of 2D flakes recorded at random film locations to show nominal flake thickness after exfoliation.

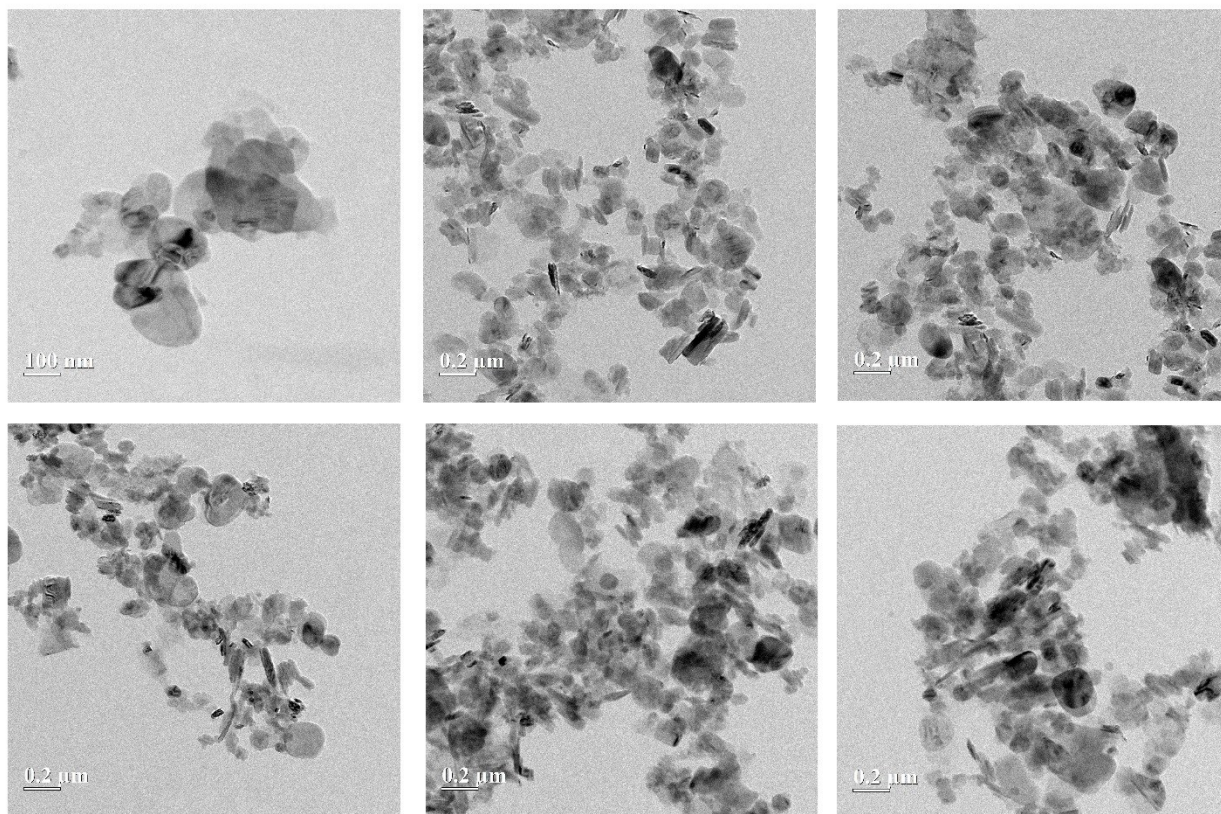

Supplementary Figure 3: HR-TEM images of the 3D exfoliated hBN flakes ascertaining the 2D nature and successful exfoliation.
